# Supplementary material
Source: PubMed Central journal article supplement (PMC6153835)
Supplement: zac010187523s1.pdf [file zac010187523s1.pdf]

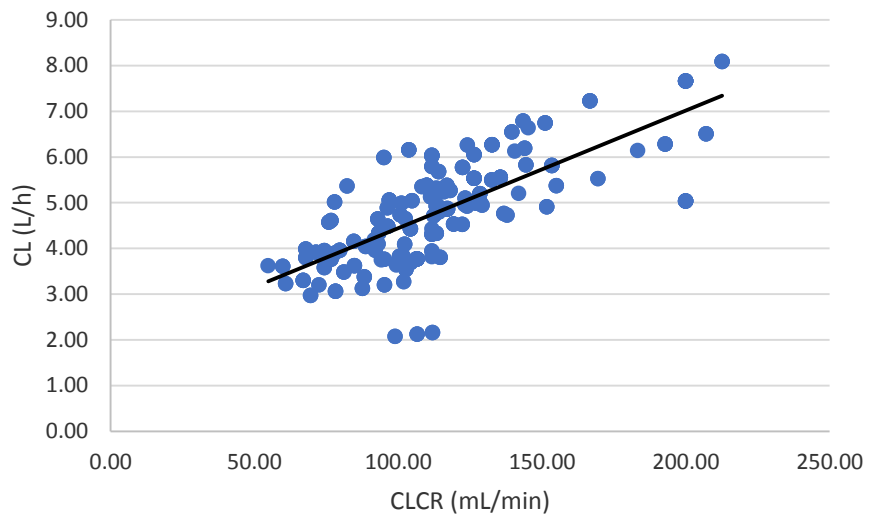

**Figure S1.** Correlation between creatinine clearance (CLCR) and clearance in the studied population.
